# Supplementary material
Source: HighWire-hosted journal article supplement (https://lupus.bmj.com/content/4/1/e000192)

Supplementary figure; sample plots of scores on the PGA and SLEDAI over time for 1 patient

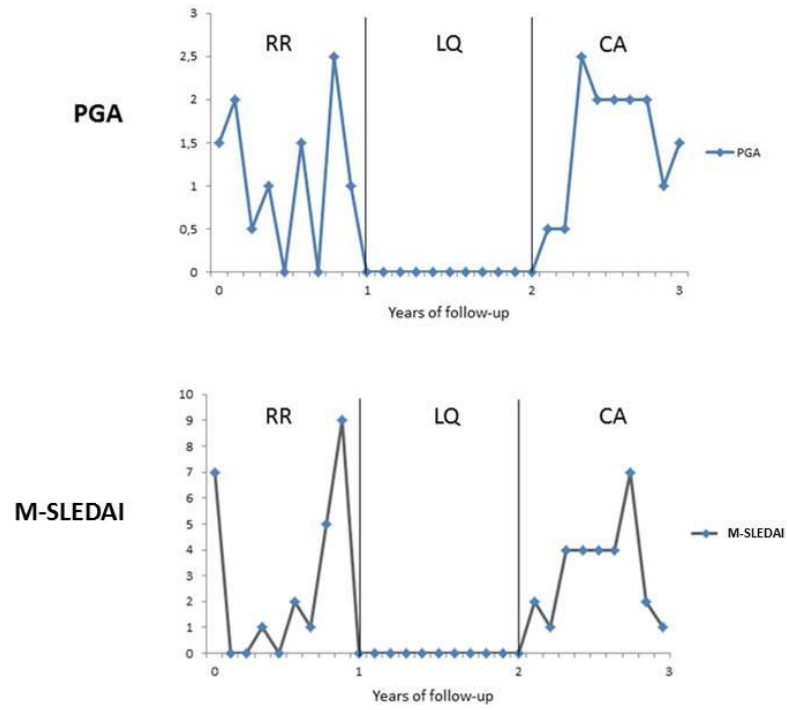

Supplement: inline-supplementary-material-1 [file inline-supplementary-material-1.pdf]
